# Supplementary material for: Step by step crystal-to-crystal transformation from 1D K2Cu(C2O4)2(H2O)4(1) to 1D K2Cu(C2O4)2(H2O)2(2) and then 1D K2Cu(C2O4)2(3) by dehydration
Source: Royal Society of Chemistry journal article supplement (doi:10.1039/c6ce00786d), 2016-01-01
Supplement: c6ce00786d1.pdf [file c6ce00786d1.pdf]

**Electronic Supporting information for “Step by Step Crystal-to-Crystal Transformation from 1D  $\text{K}_2\text{Cu}(\text{C}_2\text{O}_4)_2(\text{H}_2\text{O})_4$  (**1**) to 1D  $\text{K}_2\text{Cu}(\text{C}_2\text{O}_4)_2(\text{H}_2\text{O})_2$  (**2**), then 1D  $\text{K}_2\text{Cu}(\text{C}_2\text{O}_4)_2$  (**3**) by Dehydration”**

The IR experiment of single crystal was carried out on Bio-rad FTS6000/UMA500 Microscope with  $4\text{ cm}^{-1}$  resolution at room-temperature.

Thermogravimetric analysis was carried out on a Shimadzu DTG-60 analyzer at a  $10^\circ\text{C}/\text{min}$  heating rate from room-temperature to  $550^\circ\text{C}$ . DSC experiment of **1** was carried out on TA Q600 and Diamond D800 with sample sealed in Al cap after crystal removed from solution as soon as possible.

Because **1** is unstable when exposure to air, the single crystal X-ray diffraction data was collected at 173 K. For compare, the single crystal X-ray diffraction data of **2** and **3** were collected at 173K

The single crystal X-ray diffraction data was collected at 173 K on Rigaku diffractometer with confused monochromated Mo  $K\alpha$  ( $\lambda = 0.71073\text{ \AA}$ ) radiation.<sup>1</sup> The structure was solved by direct method and refined by full-matrix least-squares on  $F^2$  using SHELX program, with anisotropic thermal parameters for all non-hydrogen atoms.<sup>2</sup> Hydrogen atoms of  $\text{H}_2\text{O}$  were located by difference Fourier map and refined isotropically. The related crystallographic data was listed on Table S1.

The powder X-ray diffraction pattern was obtained on a Rigaku RINT2000 diffractometer at room temperature with Cu  $K\alpha$  ( $\lambda = 1.54056\text{ \AA}$ ) radiation in a flat-plate geometry.

Magnetization measurements were performed against tightly packed polycrystalline sample in capsule on a Quantum Design MPMS 7XL SQUID system. Susceptibility data were corrected for diamagnetism of sample by Pascal constants ( $-142.8 \times 10^{-6}\text{ cm}^3\text{mol}^{-1}$  for **1**;  $-117.8 \times 10^{-6}\text{ cm}^3\text{mol}^{-1}$  for **2**;  $-91.8 \times 10^{-6}\text{ cm}^3\text{mol}^{-1}$  for **3**) and background by experimental measurement on the sample holder.

References:

- [1] Rigaku CrystalClear (2007). Version 1.4.0. Rigaku Inc., Tokyo, Japan.
- [2] Sheldrick, G. M. (2008). Acta Cryst. A64, 112-122.

Table S1. Crystallographic data of 1-3

| Compound                                                                                 | 1                                                                        | 2                                                                                    | 3                                                                            |
|------------------------------------------------------------------------------------------|--------------------------------------------------------------------------|--------------------------------------------------------------------------------------|------------------------------------------------------------------------------|
| formula                                                                                  | C <sub>4</sub> H <sub>8</sub> CuK <sub>2</sub> O <sub>12</sub>           | C <sub>4</sub> H <sub>4</sub> CuK <sub>2</sub> O <sub>10</sub>                       | C <sub>4</sub> CuK <sub>2</sub> O <sub>8</sub>                               |
| Color                                                                                    | Blue-purple                                                              | Blue                                                                                 | Blue                                                                         |
| Fw                                                                                       | 389.84                                                                   | 353.81                                                                               | 317.78                                                                       |
| F(000)                                                                                   | 390                                                                      | 350                                                                                  | 310                                                                          |
| T, K                                                                                     | 173                                                                      | 173                                                                                  | 173                                                                          |
| crystal system                                                                           | Monoclinic                                                               | Triclinic                                                                            | Monoclinic                                                                   |
| space group                                                                              | <i>P</i> 2 <sub>1</sub> /n                                               | <i>P</i> $\bar{1}$                                                                   | <i>P</i> 2 <sub>1</sub> /n                                                   |
| Cell parameters                                                                          | 3.7345(7)<br>14.764(3)<br>10.742(2)<br>90<br>93.23(2)<br>90,<br>591.3(2) | 6.904(2)<br>8.660(3)<br>8.929(3)<br>107.950(4)<br>99.637(4)<br>97.637(4)<br>490.9(3) | 4.8886(11)<br>6.6448(15)<br>13.171(3)<br>90<br>96.305(5)<br>90<br>425.25(17) |
| Z                                                                                        | 2                                                                        | 2                                                                                    | 2                                                                            |
| <i>D<sub>c</sub></i> , g/cm <sup>3</sup>                                                 | 2.190                                                                    | 2.394                                                                                | 2.482                                                                        |
| $\mu$ (Mo <i>K</i> $\alpha$ ), mm <sup>-1</sup>                                          | 2.611                                                                    | 3.118                                                                                | 3.568                                                                        |
| crystal size, mm <sup>3</sup>                                                            | 0.280*0.104*0.094                                                        | 0.293*0.252*0.198                                                                    | 0.12*0.08*0.07                                                               |
| <i>T</i> <sub>min</sub> and <i>T</i> <sub>max</sub>                                      | 0.6079, 0.8074                                                           | 0.4632, 1.0000                                                                       | 0.7782, 1.0000                                                               |
| $\theta$ <sub>min</sub> , $\theta$ <sub>max</sub> , °                                    | 3.350, 27.48                                                             | 3.557, 27.54                                                                         | 3.112, 27.468                                                                |
| Completeness, %                                                                          | 99.3                                                                     | 97.8                                                                                 | 99.7                                                                         |
| no. total reflns.                                                                        | 4206                                                                     | 4162                                                                                 | 3644                                                                         |
| no. uniq. reflns. ( <i>R</i> <sub>int</sub> )                                            | 1341(0.0373)                                                             | 2211(0.0316)                                                                         | 977(0.0472)                                                                  |
| no. obs. [ <i>I</i> ≥ 2σ( <i>I</i> <sub>0</sub> )]                                       | 1268                                                                     | 2158                                                                                 | 916                                                                          |
| no. params.                                                                              | 104                                                                      | 173                                                                                  | 70                                                                           |
| <i>R</i> <sub>1</sub> , <i>wR</i> <sub>2</sub> [ <i>I</i> ≥ 2σ( <i>I</i> <sub>0</sub> )] | 0.0304, 0.0623                                                           | 0.0283, 0.0774                                                                       | 0.0332, 0.0753                                                               |
| <i>R</i> <sub>1</sub> , <i>wR</i> <sub>2</sub> (all data)                                | 0.0333, 0.0640                                                           | 0.0290, 0.0781                                                                       | 0.0367, 0.0768                                                               |
| GOF                                                                                      | 1.132                                                                    | 1.075                                                                                | 1.174                                                                        |
| <sup>a</sup> Δρ, e/Å <sup>3</sup>                                                        | 0.421/-0.354                                                             | 0.525/-0.556                                                                         | 0.433/-0.405                                                                 |
| <sup>b</sup> Max. and mean Δ/σ                                                           | 0.000/0.000                                                              | 0.000/0.000                                                                          | 0.000/0.000                                                                  |
| CCDC                                                                                     | 851224                                                                   | 844292                                                                               | 844291                                                                       |

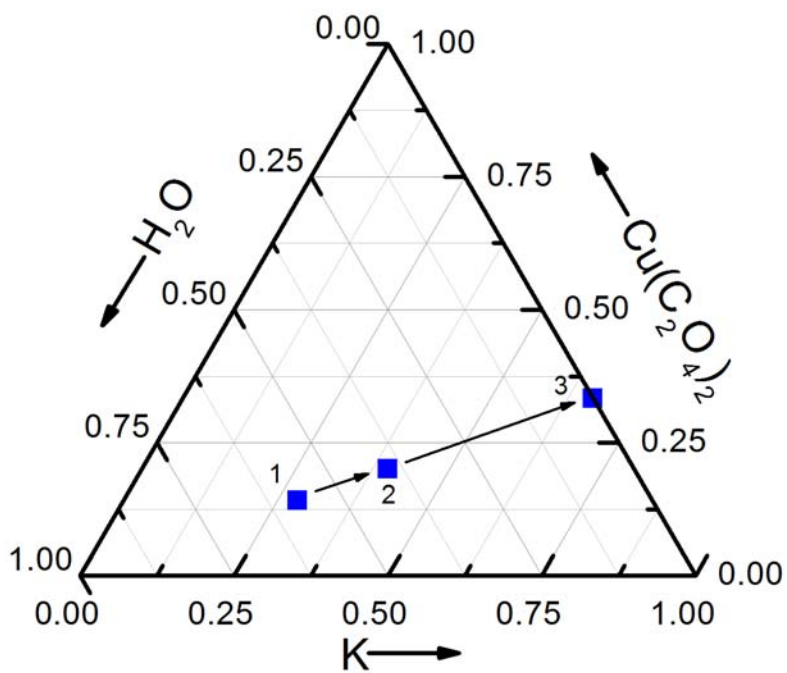

Figure S1. Phase-diagram of ternary K-Cu(C<sub>2</sub>O<sub>4</sub>)<sub>2</sub>-H<sub>2</sub>O system.

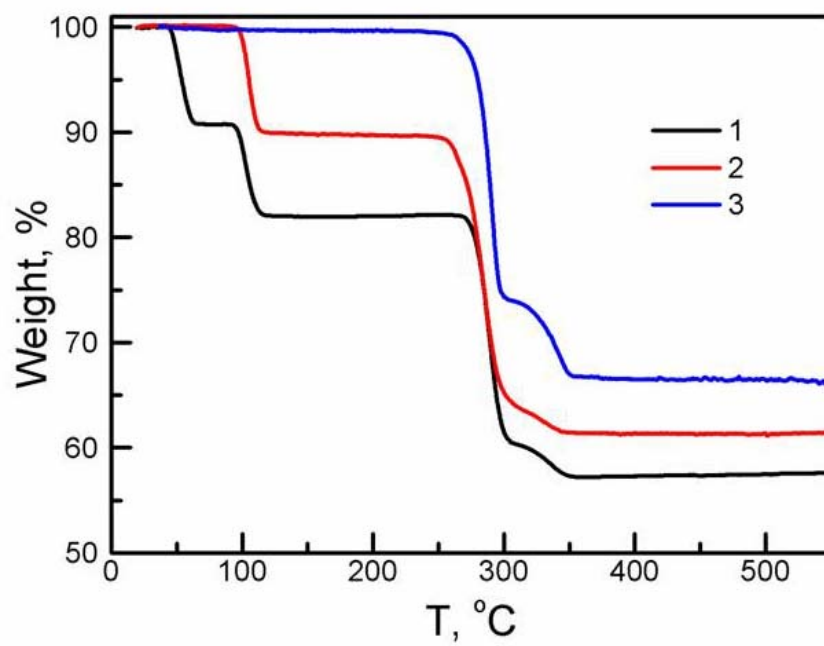

Figure S2. TGA plots of **1-3**.

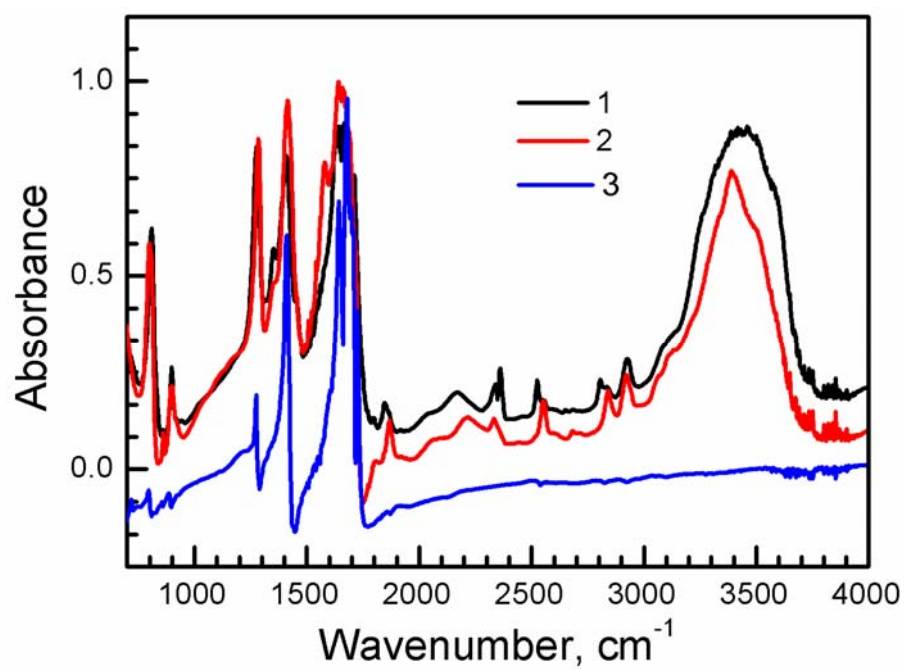

Figure S3. IR spectra on single crystal **1**, **2** and **3**.

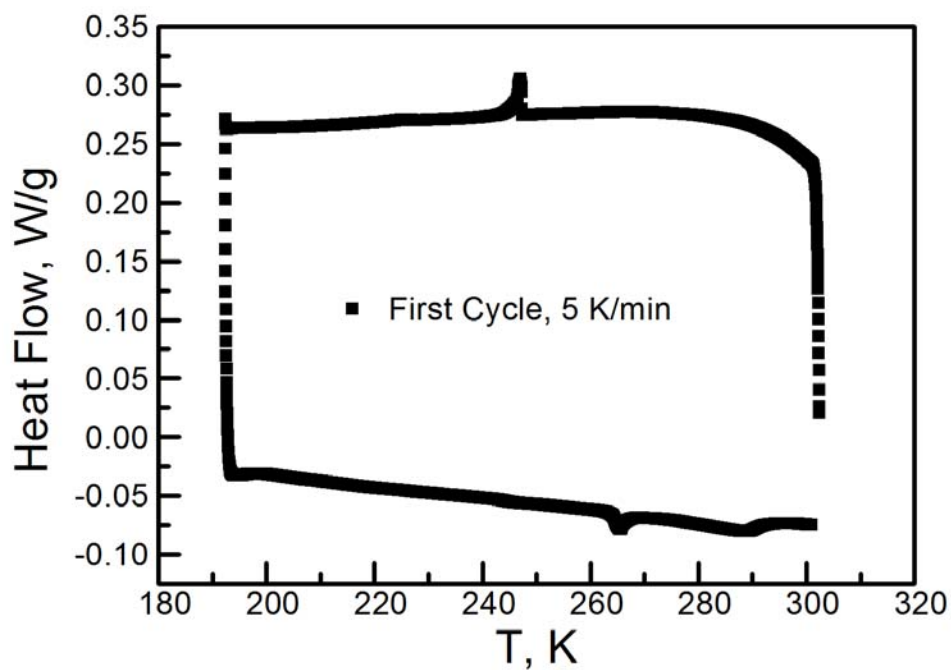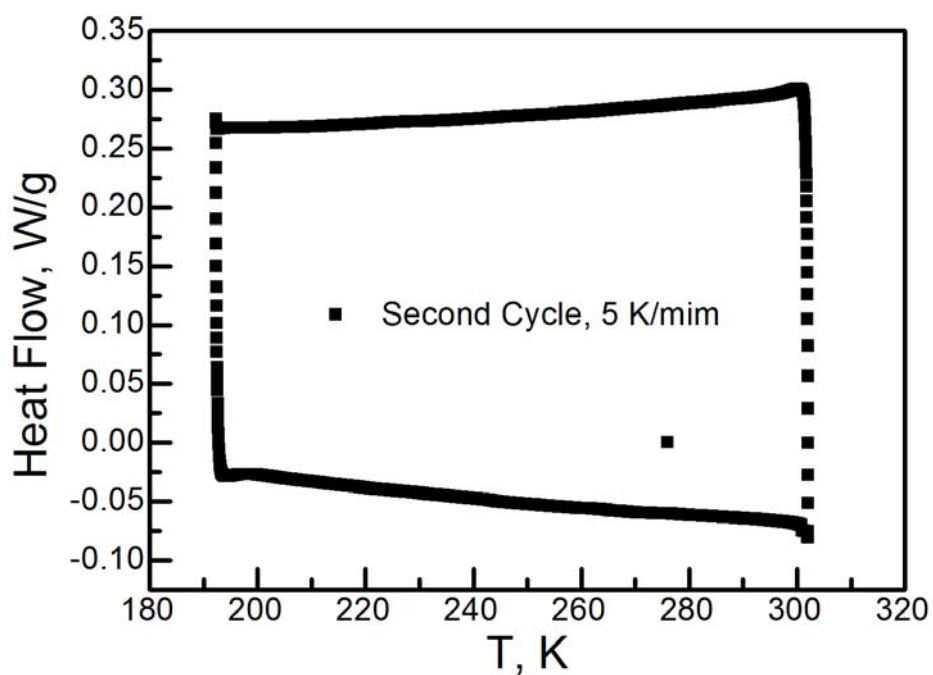

Figure S4. Differential Scanning Calorimeter of **1** with rate of 5 K/min between room-temperature and 190 K. The exotherm and endotherm which observed in first cycle measurement (top) were not observed in the second cycle measurement (down). The powder X-ray diffraction pattern after second cycle measurement is same as **2**. This means **1** transferred into **2** thoroughly.

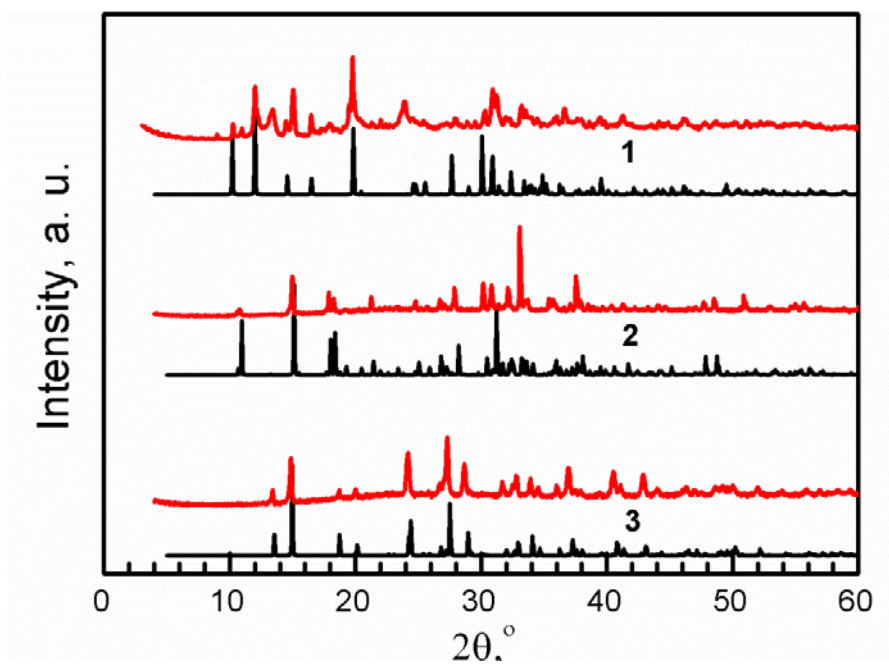

Figure S5. Powder diffraction pattern of compounds **1**, **2** and **3** at room-temperature. Black lines: simulated; red lines: experimental data. Although the experiment of **1** was carried out as soon as possible with crystal covered by Nephene-oil, there are still trace of **2** and **3** in experiment data **1**. The PXRD pattern of **2** and **3** are good.

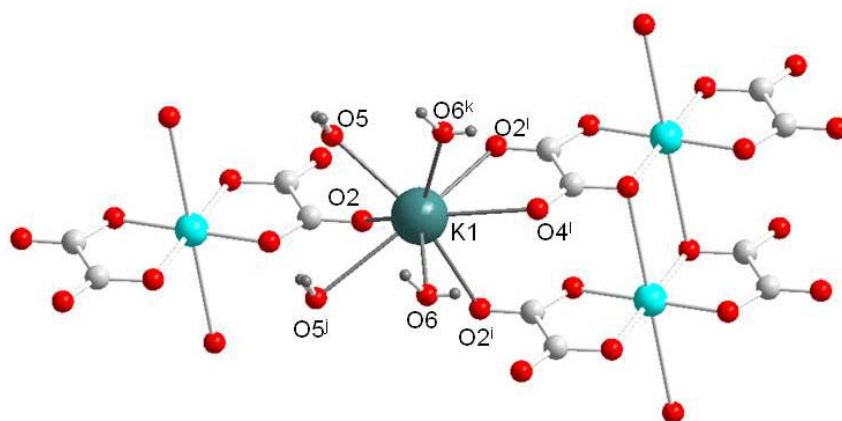

1

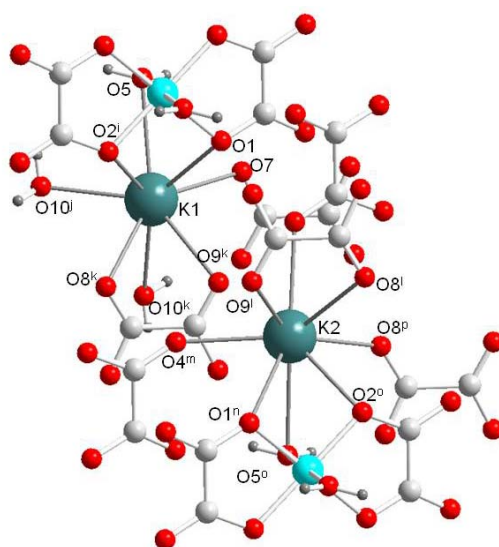

2

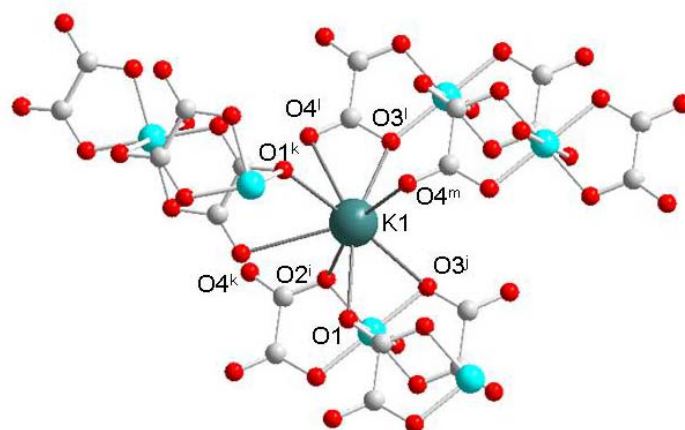

3

Figure S6. Coordination configuration of  $K^+$  in  $K_2Cu(C_2O_4)_2(H_2O)_4$  (**1**, symmetry code: i:  $-x, -y, 1-z$ ; j:  $-1+x, y, z$ ; k:  $1+x, y, z$ ; l:  $1-x, -y, 1-z$ ),  $K_2Cu(C_2O_4)_2(H_2O)_2$  (**2**, symmetry code: i:  $-x, -y, -z$ ; j:  $-1+x, y, z$ ; k:  $1-x, 1-y, 1-z$ ; l:  $x, y, -1+z$ ; m:  $x, 1+y, z$ ; n:  $1-x, 1-y, -z$ ; o:  $1+x, 1+y, z$ ; p:  $2-x, 1-y, 1-z$ ) and  $K_2Cu(C_2O_4)_2$  (**3**, symmetry code: i:  $1+x, y, z$ ; j:  $1-x, 1-y, 1-z$ ; k:  $1.5-x, 0.5+y, 0.5-z$ ; l:  $1+x, 1+y, z$ ; m:  $x, 1+y, z$ ).



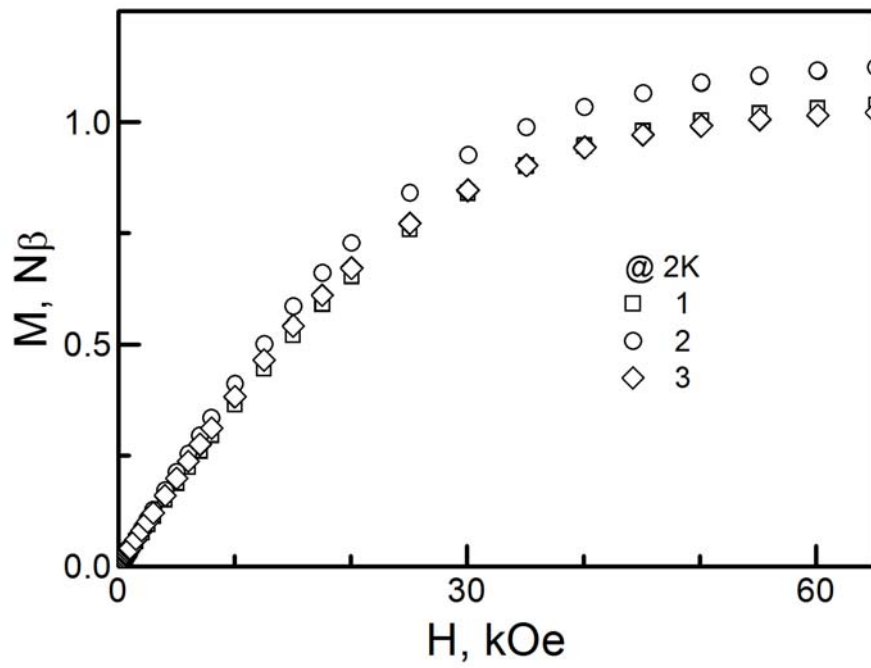

Figure S7. Isothermal magnetization at 2 K.
